# Supplementary material
Source: PubMed Central journal article supplement (PMC4148707)
Supplement: NIHMS60151-supplement-Table_S1.pdf [file NIHMS60151-supplement-Table_S1.pdf]

**Table S1.** Patient demographics of patient cohort A (Caucasians)

|                               | <b>I/I</b>   | <b>I/T</b>   | <b>T/T</b>   | <b>P value*</b> |
|-------------------------------|--------------|--------------|--------------|-----------------|
| <b>Number of patients</b>     | 2219         | 568          | 64           |                 |
| <b>Continent</b>              |              |              |              |                 |
| Europe                        | 1882 (84.8%) | 487 (85.7%)  | 57 (89.1%)   | 0.63            |
| North America                 | 337 (15.2%)  | 81 (14.3%)   | 7 (10.9%)    |                 |
| <b>Age (years)</b>            |              |              |              |                 |
| 18–64                         | 1999 (90.1%) | 506 (89.1%)  | 60 (93.8%)   | 0.53            |
| 65+                           | 220 ( 9.9%)  | 62 (10.9%)   | 4 ( 6.2%)    |                 |
| Mean (range)                  | 47.6 (18–76) | 47.8 (18–74) | 49.0 (24–69) |                 |
| <b>Gender</b>                 |              |              |              |                 |
| Male                          | 1374 (61.9%) | 353 (62.1%)  | 36 (56.2%)   | 0.64            |
| Female                        | 845 (38.1%)  | 215 (37.9%)  | 28 (43.8%)   |                 |
| <b>Transplant year</b>        |              |              |              |                 |
| 1988 – 1997                   | 1452 (65.4%) | 373 (65.7%)  | 40 (62.5%)   | 0.87            |
| 1998 – 2010                   | 767 (34.6%)  | 195 (34.3%)  | 24 (37.5%)   |                 |
| <b>Transplant number</b>      |              |              |              |                 |
| 1                             | 1885 (84.9%) | 497 (87.5%)  | 51 (79.7%)   | 0.13            |
| >1                            | 334 (15.1%)  | 71 (12.5%)   | 13 (20.3%)   |                 |
| <b>HLA mismatch</b>           |              |              |              |                 |
| 0 – 1                         | 328 (14.8%)  | 85 (15.0%)   | 6 ( 9.4%)    | 0.72            |
| 2 – 4                         | 1576 (71.0%) | 404 (71.1%)  | 51 (79.7%)   |                 |
| 5 – 6                         | 315 (14.2%)  | 79 (13.9%)   | 7 (10.9%)    |                 |
| <b>Calcineurin inhibitors</b> |              |              |              |                 |
| Cyclosporine                  | 1871 (84.3%) | 490 (86.3%)  | 54 (84.4%)   | 0.53            |
| Tacrolimus                    | 348 (15.7%)  | 78 (13.7%)   | 10 (15.6%)   |                 |
| <b>Antiproliferative</b>      |              |              |              |                 |
| Azathioprine                  | 1010 (45.5%) | 266 (46.8%)  | 21 (32.8%)   | 0.20            |
| Mycophenolate                 | 701 (31.6%)  | 180 (31.7%)  | 22 (34.4%)   |                 |
| None                          | 508 (22.9%)  | 122 (21.5%)  | 21 (32.8%)   |                 |
| <b>Steroids</b>               |              |              |              |                 |
| Yes                           | 2180 (98.2%) | 560 (98.6%)  | 63 (98.4%)   | 0.89            |
| No                            | 39 ( 1.8%)   | 8 ( 1.4%)    | 1 ( 1.6%)    |                 |

\* Fisher test
